# Supplementary material
Source: PubMed Central journal article supplement (PMC2040403)
Supplement: pnas_0708210104_4.pdf [file pnas_0708210104_4.pdf]

NFAT -8914

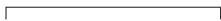

Un  
 $\alpha$ CD3/CD28  
+anti-NFATp  
+anti-NFATc  
+NRS

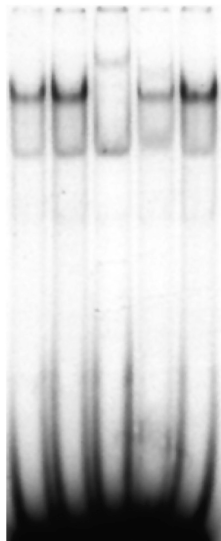

← NFATp

1 2 3 4 5

HSS-9 RII (EMSA probe)

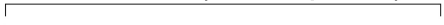

5' AGGCCAGATGGAAAAGACACAT 3'
