# Supplementary material
Source: PubMed Central journal article supplement (PMC2040403)
Supplement: pnas_0708210104_5.pdf [file pnas_0708210104_5.pdf]

Neutral T cells

BALB/c

NFATp -/-

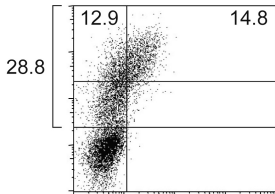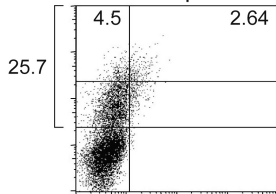

Th1

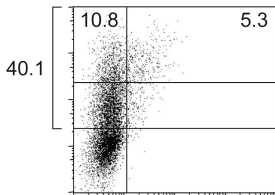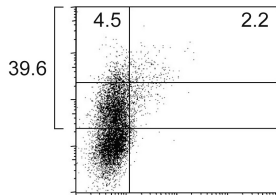

Th2

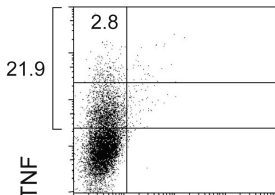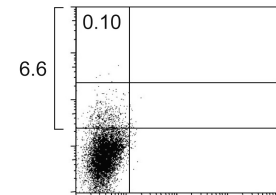

TNF  
↑  
IL-2  
→
