# Supplementary material
Source: PubMed Central journal article supplement (PMC2040403)

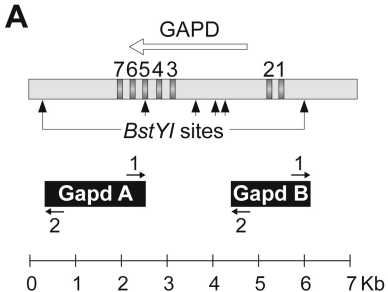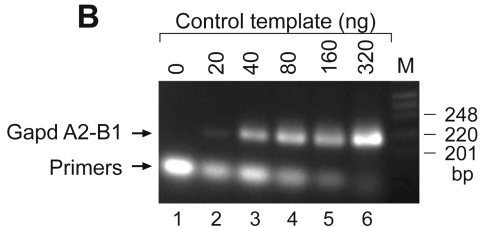

Supplement: pnas_0708210104_6.pdf [file pnas_0708210104_6.pdf]
