# Supplementary material
Source: PubMed Central journal article supplement (PMC2040403)
Supplement: pnas_0708210104_7.pdf [file pnas_0708210104_7.pdf]

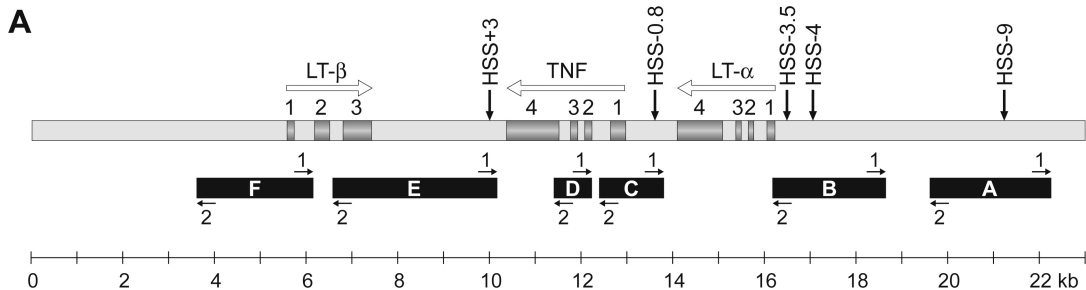

**A<sub>1</sub>** 5' CGGTTC AAGTGGGACCTTTT 3'  
**A<sub>2</sub>** TAAAGGCATGCGCCACCAAT  
**B<sub>1</sub>** CCGAATGTCATCCATCTATC  
**B<sub>2</sub>** GCTTCCTCTATAAAGGGACC  
**C<sub>1</sub>** TCTCCCAATCCGTATGACTC  
**C<sub>2</sub>** CATGCGTCCAGCTGACTAAA  
**D<sub>1</sub>** TGTCCAACCCACGGCTTCTT  
**D<sub>2</sub>** ACTAAGAGGGTGACACTGAC  
**E<sub>1</sub>** GTTGGCTGCCTTTTGTTC  
**E<sub>2</sub>** CGTGATCTCTAGGTCGGAGA  
**F<sub>1</sub>** GAGAAGATCATTGGCTCAGG  
**F<sub>2</sub>** GCACTGACTGCTCTTCTGAA

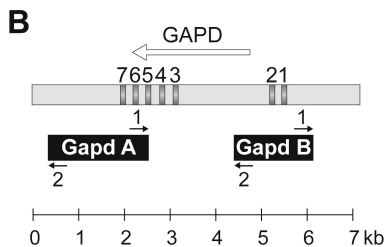

**Gapd A<sub>1</sub>** 5' GATGTCATCATACTTGGCCT 3'  
**Gapd A<sub>2</sub>** CTTGTCCAGCAGTAATCTGG  
**Gapd B<sub>1</sub>** CAGAGACCTGAATGCTGCTT  
**Gapd B<sub>2</sub>** GGTCATTAAGAGGATTGGGT

**C**

|                | B <sub>1</sub> | B <sub>2</sub> | C <sub>1</sub> | C <sub>2</sub> | D <sub>1</sub> | D <sub>2</sub> | E <sub>1</sub> | E <sub>2</sub> | F <sub>1</sub> | F <sub>2</sub> |
|----------------|----------------|----------------|----------------|----------------|----------------|----------------|----------------|----------------|----------------|----------------|
| A <sub>1</sub> | 126            | 197            | 215            | 169            | 238            | 284            | 149            | 230            | 210            | 164            |
| A <sub>2</sub> | 177            | 248            | 266            | 220            | 289            | 250            | 200            | 281            | 261            | 215            |
| C <sub>1</sub> | 215            | 266            | 171            | 242            | 283            | 244            | 194            | 275            | 255            | 209            |
| C <sub>2</sub> | 169            | 220            | 125            | 196            | 237            | 198            | 148            | 229            | 209            | 163            |

**D**

|                     | Gapd B <sub>1</sub> | Gapd B <sub>2</sub> |
|---------------------|---------------------|---------------------|
| Gapd A <sub>1</sub> | 249                 | 203                 |
| Gapd A <sub>2</sub> | 211                 | 165                 |
