# Supplementary material
Source: PubMed Central journal article supplement (PMC2040403)

**A**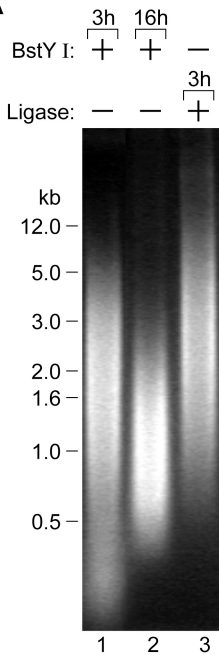**B**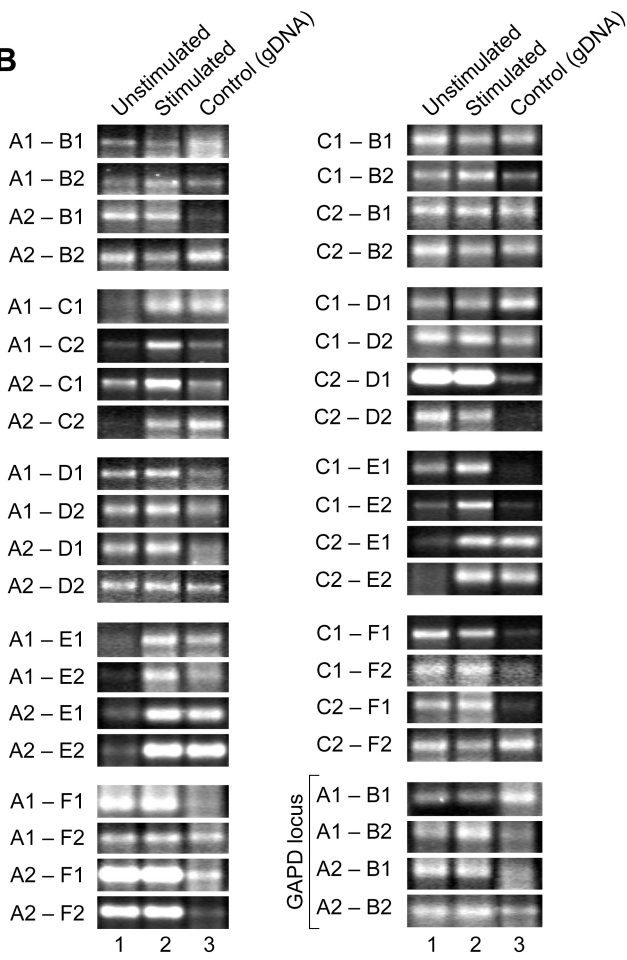

Supplement: pnas_0708210104_8.pdf [file pnas_0708210104_8.pdf]
