# Supplementary material
Source: PubMed Central journal article supplement (PMC2040403)

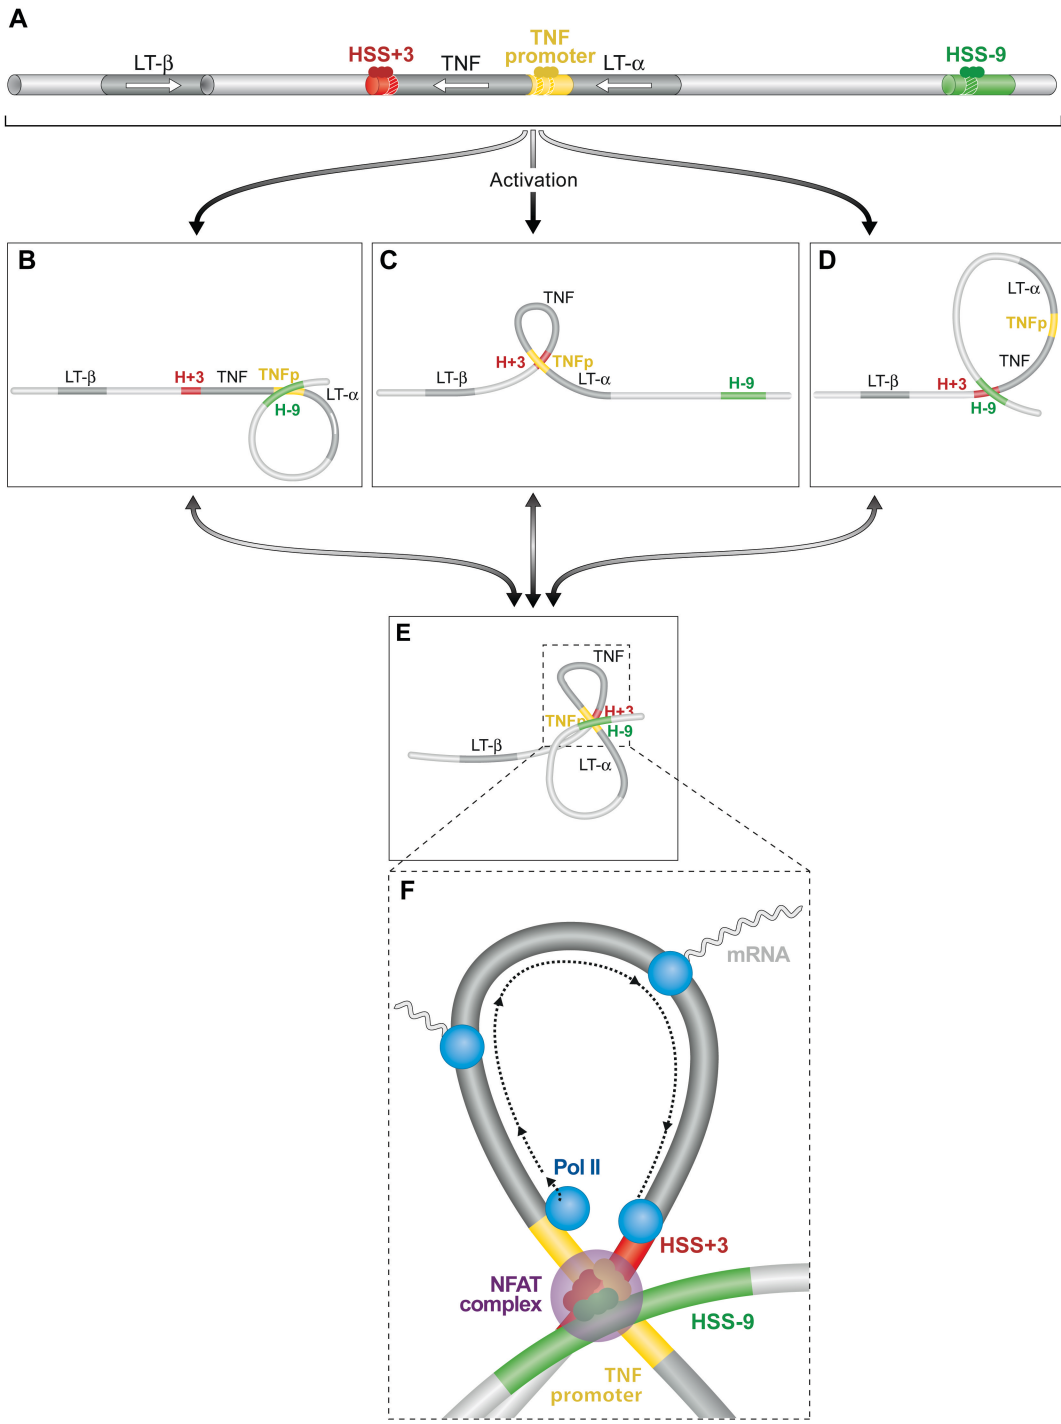

Supplement: pnas_0708210104_9.pdf [file pnas_0708210104_9.pdf]
